# Supplementary material for: Superstructure based on β-CD self-assembly induced by a small guest molecule
Source: Royal Society of Chemistry journal article supplement (doi:10.1039/c2cp22768a), 2012-01-01

## Electronic Supplementary Information

### Superstructure Based on $\beta$ -CD Self-Assembly Induced by Small Guest Molecule

*Frederico B. De Sousa<sup>a,b</sup>, Ana C. Lima<sup>a</sup>, Ângelo M. L. Denada<sup>c</sup>, Cleber P. A. Anconi<sup>d</sup>,  
Wagner B. De Almeida<sup>e</sup>, Willian T. G. Novato<sup>d</sup>, Hélio F. Dos Santos<sup>d</sup>, Chester L Drum<sup>b</sup>,  
Robert Langer<sup>b\*</sup>, and Rubén D. Sinisterra<sup>a\*</sup>.*

<sup>a</sup>Laboratório de Encapsulamento Molecular e Biomateriais (LEMB) – Departamento de Química, Instituto de Ciências Exatas, Universidade Federal de Minas Gerais (UFMG), Belo Horizonte, 31270-901, MG, Brazil.

<sup>b</sup>Department of Chemical Engineering, Massachusetts Institute of Technology (MIT), Cambridge, MA, 02139, USA.

<sup>c</sup>Centro Federal de Educação Tecnológica (CEFET-MG), Campus VII, Timóteo, MG, Brazil 35183-006.

<sup>d</sup>Núcleo de Estudos em Química Computacional (NEQC), Departamento de Química, Instituto de Ciências Exatas, Universidade Federal de Juiz de Fora (UFJF), Juiz de Fora 36036-330, MG, Brazil.

<sup>e</sup>Laboratório de Química Computacional e Modelagem Molecular (LQC-MM), Departamento de Química, Instituto de Ciências Exatas, Universidade Federal de Minas Gerais (UFMG), Belo Horizonte, 31270-901, MG, Brazil.

SI 1

UV-visible measurements for  $\beta$ -CD-Ampicillin system

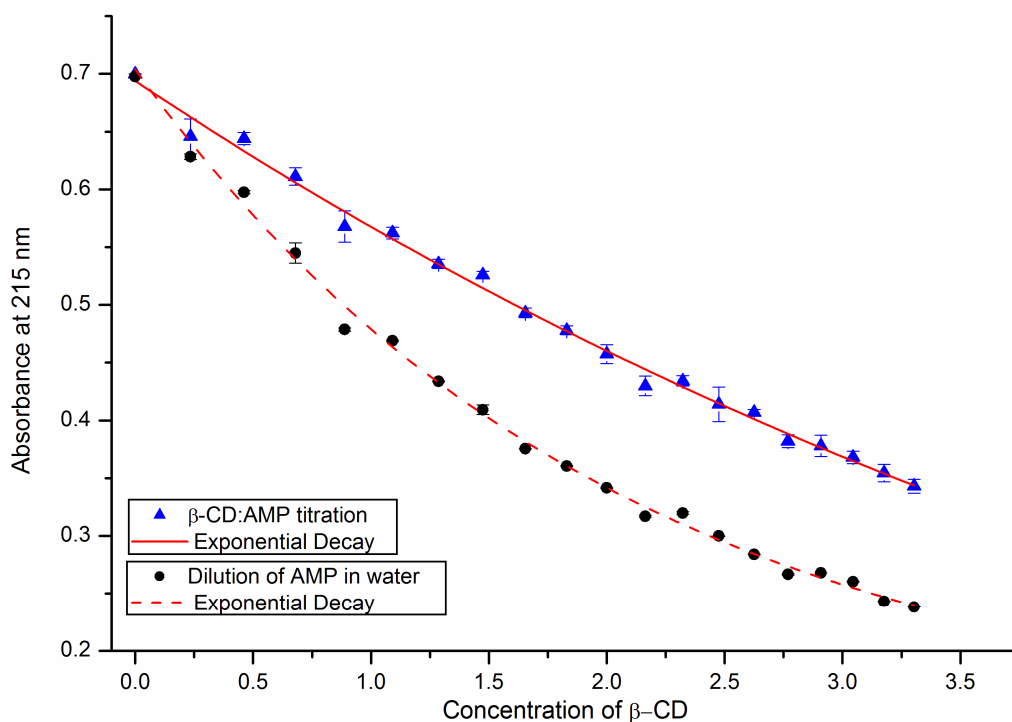

Titration curves and exponential decay adjust of:  $\beta$ -CD (12 mM) in AMP ( $6.7 \times 10^{-2}$  mM) and AMP dilution process in water.

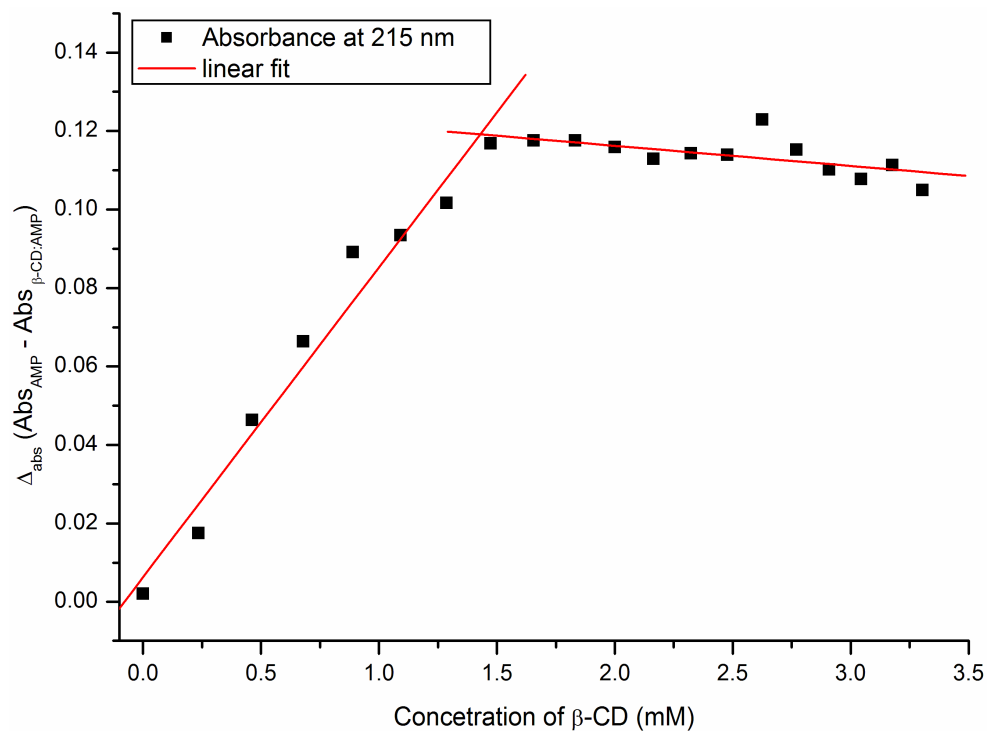

$\Delta_{\text{abs}}$  curve at 215 nm from  $\beta$ -CD (12.0 mM) titration in AMP ( $6.7 \times 10^{-2}$  mM).

SI 2

Nuclear Magnetic Resonance

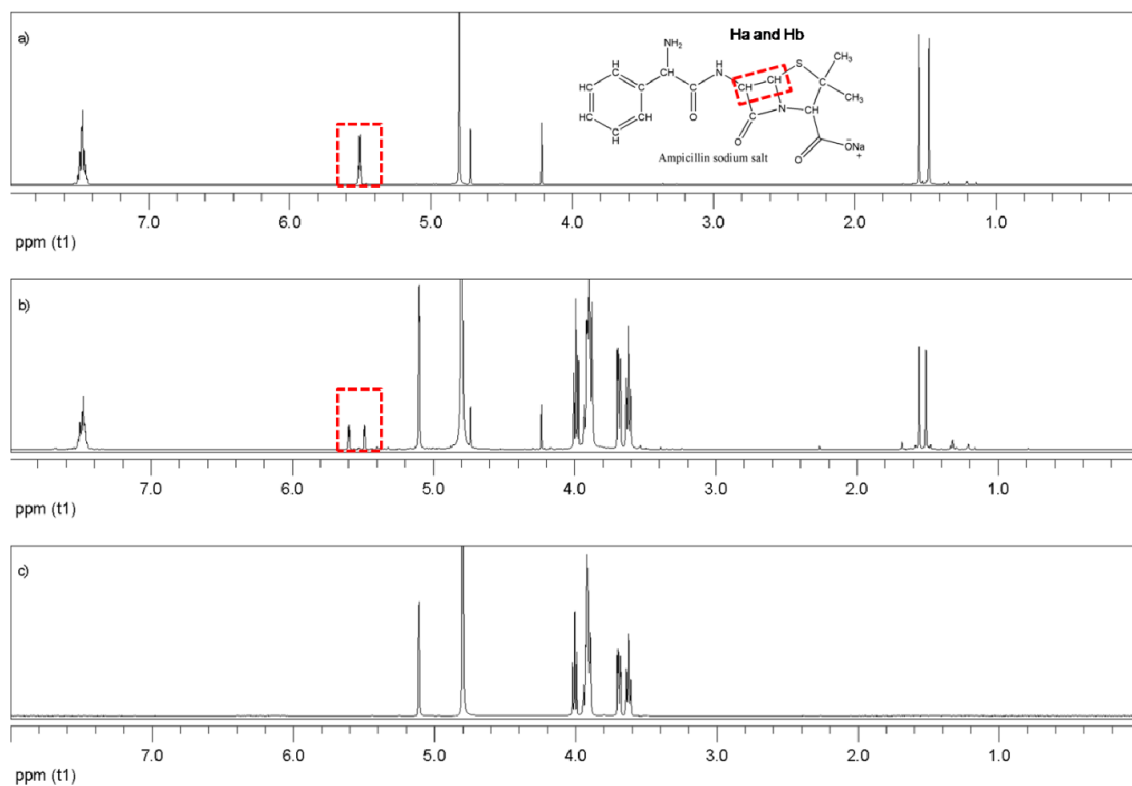

$^1\text{H}$  NMR spectra at 600 MHz in  $\text{D}_2\text{O}$  at 30 °C to: a) Ampicillin sodium salt, b)  $\beta$ -CD and c)  $\beta$ -CD:AMP at 1:1 molar ratio.

SI 3

*Isothermal Titration Calorimetry*

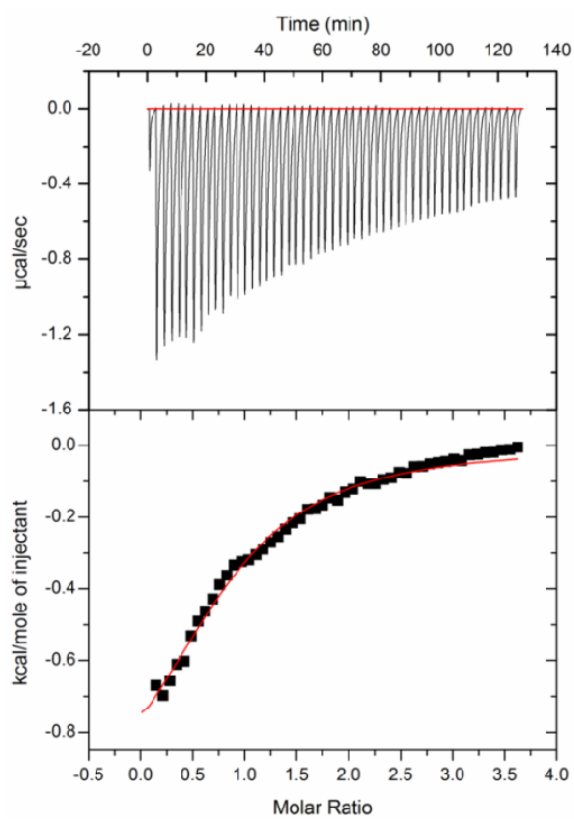

ITC final figure for AMP at 20.0 mM and  $\beta$ -CD at 1.0 mM titration at 25 °C.

SI 4

Distinct arrangement for  $\beta$ -CD:AMP considered in the present work as starting structures for MD simulation.

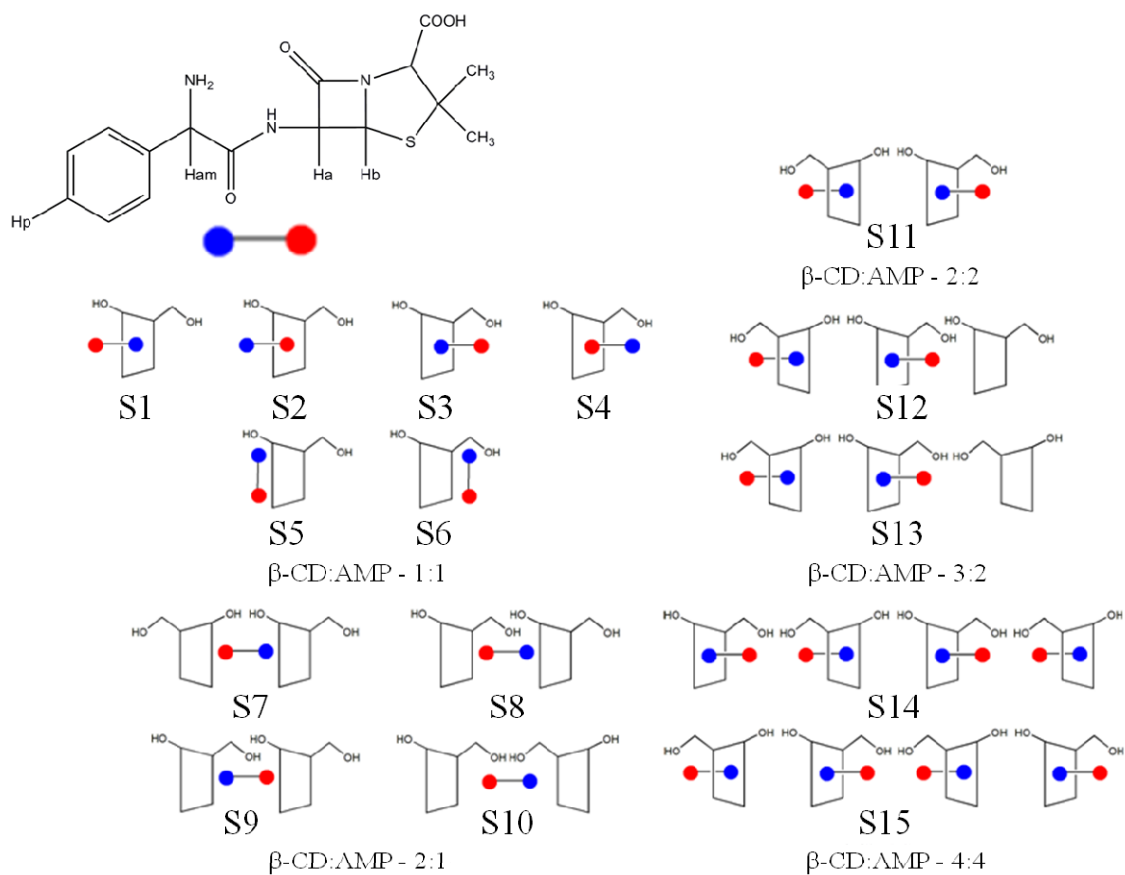

Supplement: c2cp22768a.pdf [file c2cp22768a.pdf]
